# Supplementary material
Source: MDPI journal article supplement (https://www.mdpi.com/1660-4601/16/18/3338)
Supplement: s1 [file s1]

Archive with 2 entries (2 files):
- ijerph-539958-Supplementary Table 1.pdf
- ijerph-539958-Supplementary Table 2.pdf
