# Supplementary material for: U.S. Adolescent and Adult Women’s Experiences Accessing and Using Toilets in Schools, Workplaces, and Public Spaces: A Multi-Site Focus Group Study to Inform Future Research in Bladder Health
Source: MDPI journal article supplement (doi:10.3390/ijerph16183338), 2019-09-10
Supplement: s1 [file s1]

**Supplementary Table 2. Characteristics of Participants**

|                                                  | Total       | Age Category |            |            |            |            |            |
|--------------------------------------------------|-------------|--------------|------------|------------|------------|------------|------------|
|                                                  |             | 11-14        | 15-17      | 18-25      | 26-44      | 45-64      | 65+        |
| N                                                | 360         | 18           | 26         | 51         | 72         | 104        | 89         |
| Age years, mean (SD)                             | 45.8 (21.6) | 12.4 (1.1)   | 16 (0.8)   | 21.8 (2.1) | 34.9 (5.8) | 54.9 (5.9) | 73.2 (6.9) |
| Age years, range                                 | (11-93)     | (11-14)      | (15-17)    | (18-25)    | (26-44)    | (45-64)    | (65-93)    |
| Race, n (%) <sup>1</sup>                         |             |              |            |            |            |            |            |
| White/Caucasian                                  | 145 (40.3%) | 9 (50%)      | 7 (26.9%)  | 29 (56.9%) | 24 (33.3%) | 34 (32.7%) | 42 (47.2%) |
| Black/African-American                           | 114 (31.7%) | 8 (44.4%)    | 13 (50%)   | 9 (17.6%)  | 13 (18.1%) | 42 (40.4%) | 29 (32.6%) |
| Asian                                            | 5 (1.4%)    | 0 (0%)       | 0 (0%)     | 2 (3.9%)   | 3 (4.2%)   | 0 (0%)     | 0 (0%)     |
| American Indian/Alaska Native                    | 1 (0.3%)    | 0 (0%)       | 0 (0%)     | 0 (0%)     | 1 (1.4%)   | 0 (0%)     | 0 (0%)     |
| Middle Eastern/North African                     | 1 (0.3%)    | 0 (0%)       | 0 (0%)     | 1 (2%)     | 0 (0%)     | 0 (0%)     | 0 (0%)     |
| Native Hawaiian/Other Pacific Islander           | 0 (0%)      | 0 (0%)       | 0 (0%)     | 0 (0%)     | 0 (0%)     | 0 (0%)     | 0 (0%)     |
| Some other Race/Ethnicity/Origin                 | 73 (20.3%)  | 1 (5.6%)     | 4 (15.4%)  | 8 (15.7%)  | 31 (43.1%) | 18 (17.3%) | 11 (12.4%) |
| Participant did not answer                       | 23 (6.4%)   | 0 (0%)       | 3 (11.5%)  | 2 (3.9%)   | 1 (1.4%)   | 10 (9.6%)  | 7 (7.9%)   |
| Ethnicity, n (%)                                 |             |              |            |            |            |            |            |
| Hispanic, Latina                                 | 117 (32.5%) | 2 (11.1%)    | 7 (26.9%)  | 10 (19.6%) | 36 (50%)   | 35 (33.7%) | 27 (30.3%) |
| Geographic, n (%)                                |             |              |            |            |            |            |            |
| Rural                                            | 45 (12.5%)  | 0 (0%)       | 0 (0%)     | 11 (21.6%) | 0 (0%)     | 7 (6.7%)   | 27 (30.3%) |
| Suburban                                         | 69 (19.2%)  | 8 (44.4%)    | 5 (19.2%)  | 17 (33.3%) | 14 (19.4%) | 16 (15.4%) | 9 (10.1%)  |
| Urban                                            | 246 (68.3%) | 10 (55.6%)   | 21 (80.8%) | 23 (45.1%) | 58 (80.6%) | 81 (77.9%) | 53 (59.6%) |
| Language spoken at home, n (%)                   |             |              |            |            |            |            |            |
| English                                          | 280 (77.8%) | 18 (100%)    | 26 (100%)  | 50 (98%)   | 41 (56.9%) | 79 (76%)   | 66 (74.2%) |
| Spanish                                          | 75 (20.8%)  | 0 (0%)       | 0 (0%)     | 1 (2%)     | 26 (36.1%) | 25 (24%)   | 23 (25.8%) |
| Another Language                                 | 5 (1.4%)    | 0 (0%)       | 0 (0%)     | 0 (0%)     | 5 (6.9%)   | 0 (0%)     | 0 (0%)     |
| Lower Urinary Tract Symptoms, n (%) <sup>2</sup> |             |              |            |            |            |            |            |
| Any LUTS                                         | 275 (76.4%) | 8 (44.4%)    | 17 (65.4%) | 33 (64.7%) | 53 (73.6%) | 86 (82.7%) | 78 (87.6%) |

<sup>1</sup> The survey question about race allowed participants to denote multiple races, such that the percentages within a column do not always sum up to 100.

<sup>2</sup> Any LUTS was defined as endorsing any of the LUTS on the LUTS Tool questionnaire (adults) or the ICIQ CLUTS Survey (adolescents)
